# Supplementary material for: Three-dimensional structure and molecular dynamics studies of prorrenin/renin receptor: description of the active site
Source: Royal Society of Chemistry journal article supplement (doi:10.1039/c5mb00342c), 2015-07-08
Supplement: c5mb00342c1.pdf [file c5mb00342c1.pdf]

Supplementary information

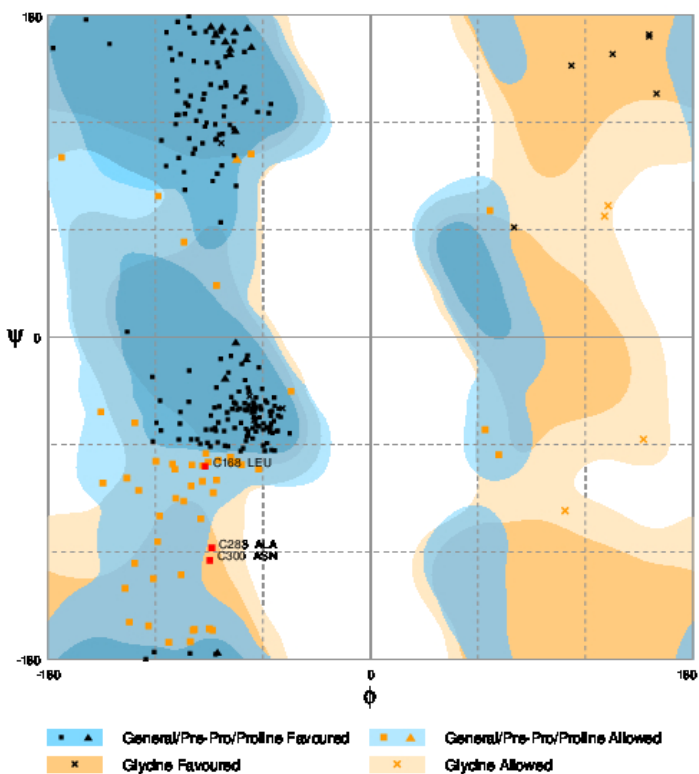

S-1 Ramachandran plot of the amino acids that make up the receptor (PRR)

Program: ERRAT2  
File: /var/www/html/Services/ERRAT/DATA/3165393.pdb  
Chain#:1  
Overall quality factor\*\*: 92.140

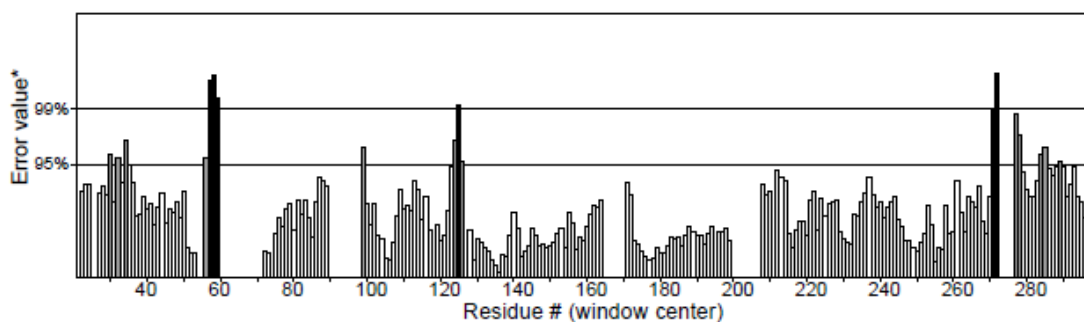

\*On the error axis, two lines are drawn to indicate the confidence with which it is possible to reject regions that exceed that error value.  
\*\*Expressed as the percentage of the protein for which the calculated error value falls below the 95% rejection limit. Good high resolution structures generally produce values around 95% or higher. For lower resolutions (2.5 to 3Å) the average overall quality factor is around 91%.

S-2. Plot ERRAT quality model (PRR) obtained by molecular modeling





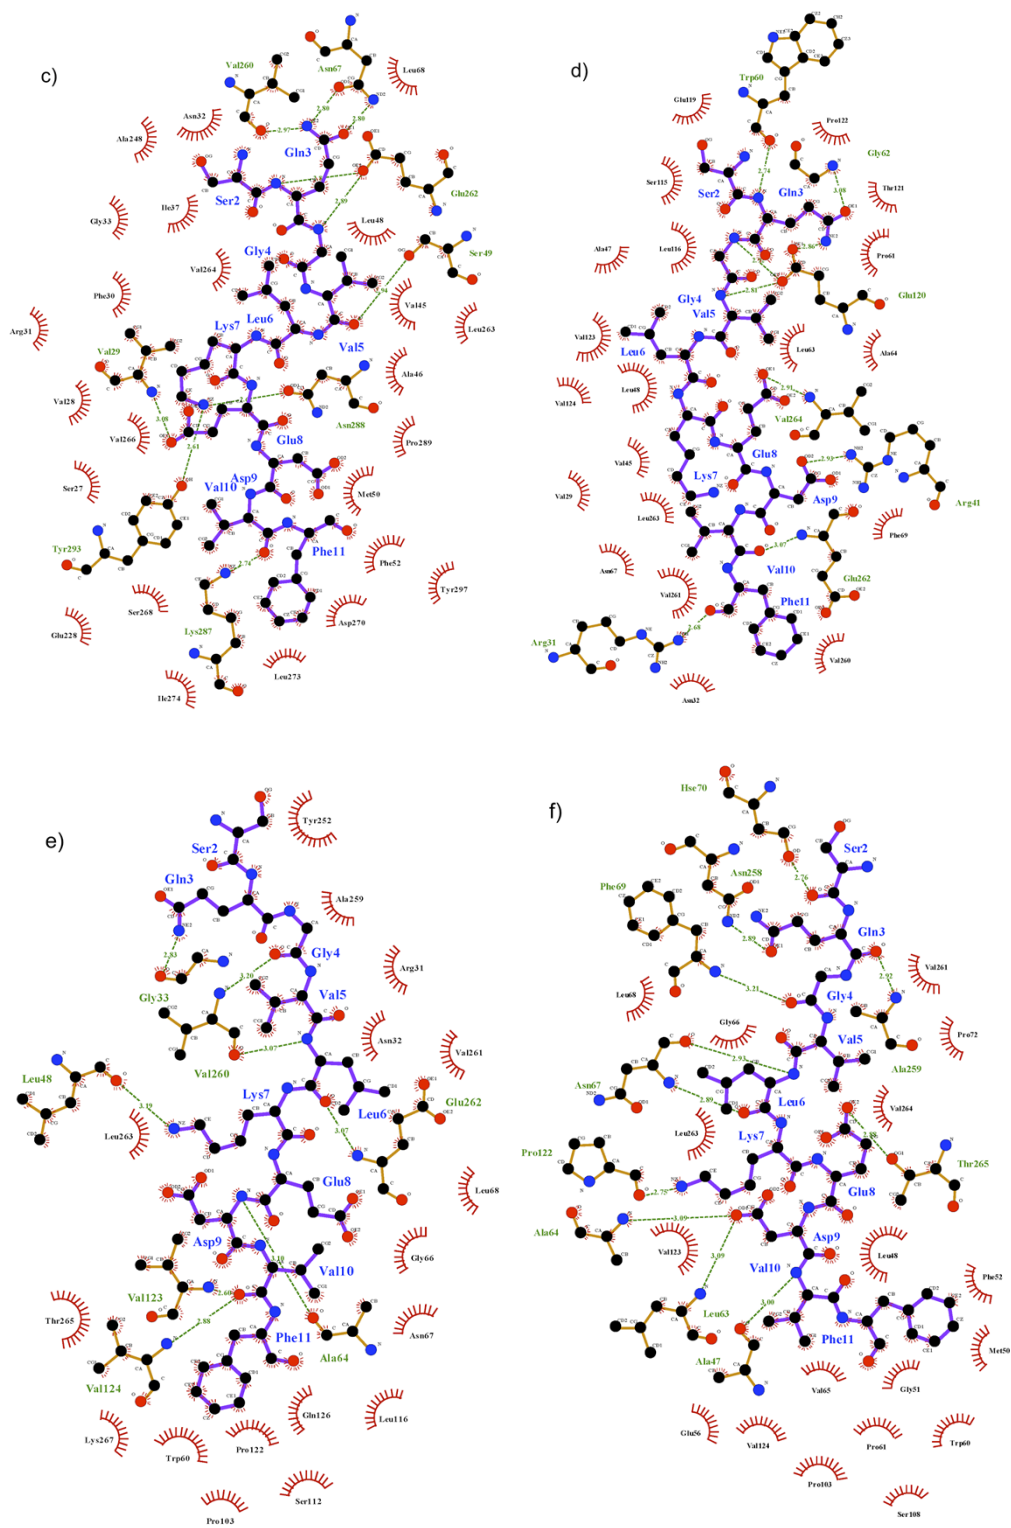

S-4. Aminoacids residues that formed binding site predicted on the PRR and main interactions obtained for the peptide SQGLKEDVF with PRR.
